# Supplementary material
Source: ML conference proceedings conference paper supplement (https://openreview.net/forum?id=W6Y10yeedA)
Supplement: supplementary_material [file attachment]

# ViSTA-SLAM: Visual SLAM with Symmetric Two-view Association

## Supplementary Material

| Method      | Metric       | chess | fire  | heads | office | pumpkin | redkitchen | stairs | Avg          |
|-------------|--------------|-------|-------|-------|--------|---------|------------|--------|--------------|
| CUT3R       | Accuracy     | 0.274 | 0.102 | 0.106 | 0.326  | 0.452   | 0.325      | 0.345  | 0.276        |
|             | Completeness | 0.303 | 0.081 | 0.093 | 0.441  | 0.459   | 0.358      | 0.389  | 0.303        |
|             | Chamfer      | 0.289 | 0.091 | 0.100 | 0.384  | 0.456   | 0.342      | 0.367  | 0.290        |
|             | ATE          | 0.743 | 0.226 | 0.363 | 0.664  | 0.546   | 0.381      | 0.413  | 0.477        |
| SLAM3R      | Accuracy     | 0.043 | 0.022 | 0.020 | 0.035  | 0.072   | 0.062      | 0.116  | 0.053        |
|             | Completeness | 0.030 | 0.013 | 0.015 | 0.030  | 0.055   | 0.061      | 0.209  | <u>0.059</u> |
|             | Chamfer      | 0.037 | 0.018 | 0.017 | 0.033  | 0.064   | 0.061      | 0.162  | <u>0.056</u> |
|             | ATE          | 0.089 | 0.048 | 0.036 | 0.088  | 0.196   | 0.102      | 0.126  | 0.098        |
| MASt3R-SLAM | Accuracy     | 0.090 | 0.037 | 0.027 | 0.047  | 0.097   | 0.070      | 0.045  | 0.059        |
|             | Completeness | 0.055 | 0.024 | 0.021 | 0.053  | 0.054   | 0.036      | 0.149  | <b>0.056</b> |
|             | Chamfer      | 0.073 | 0.031 | 0.024 | 0.050  | 0.075   | 0.053      | 0.097  | 0.057        |
|             | ATE          | 0.063 | 0.046 | 0.029 | 0.103  | 0.112   | 0.074      | 0.032  | <u>0.066</u> |
| VG GT-SLAM  | Accuracy     | 0.029 | 0.014 | 0.031 | 0.041  | 0.128   | 0.036      | 0.087  | <u>0.052</u> |
|             | Completeness | 0.052 | 0.064 | 0.021 | 0.066  | 0.054   | 0.057      | 0.110  | 0.061        |
|             | Chamfer      | 0.040 | 0.039 | 0.026 | 0.054  | 0.091   | 0.047      | 0.098  | <u>0.056</u> |
|             | ATE          | 0.037 | 0.026 | 0.022 | 0.103  | 0.147   | 0.063      | 0.095  | 0.070        |
| Ours        | Accuracy     | 0.065 | 0.015 | 0.031 | 0.036  | 0.061   | 0.035      | 0.074  | <b>0.045</b> |
|             | Completeness | 0.063 | 0.022 | 0.040 | 0.048  | 0.037   | 0.030      | 0.154  | <b>0.056</b> |
|             | Chamfer      | 0.064 | 0.019 | 0.035 | 0.042  | 0.049   | 0.033      | 0.114  | <b>0.051</b> |
|             | ATE          | 0.073 | 0.035 | 0.028 | 0.055  | 0.129   | 0.035      | 0.029  | <b>0.055</b> |

Table 7. **Per Scene Evaluation on 7-Scenes** [43]. Comparison of accuracy, completeness, Chamfer distance, and trajectory error on the 7-Scenes dataset. Lower is better. Best results are **bold**, second best are underlined.

## 5. Relative Scale in Pose Graph

As mentioned in Sec. 2.3, the *scale edges* connect nodes corresponding to the same view but obtained from different forwarding passes. Since the training supervision of the frontend STA model uses only normalized pointmaps, the scales of the same view across different passes are not consistent. Therefore, estimating the relative scale is crucial for pose graph construction. Given two pointmaps  $P_i^j$  and  $P_i^k$  of the same view  $i$  (obtained from forwarding passes with input view  $i, j$  and view  $i, k$ , respectively), along with their confidence maps  $C_i^j$  and  $C_i^k$ , we first get the confidence score  $w_x$  of the point pair for pixel  $x$ ,

$$w_x = C_i^j(x) \cdot C_i^k(x),$$

then, the relative scale  $s_i^{jk}$  can be computed as,

$$s_i^{jk} = \min_s \sum_x w_x \|P_i^j(x) - sP_i^k(x)\|^2$$

$$= \frac{\sum_x w_x (P_i^j(x) \cdot P_i^k(x))}{\sum_x w_x \|P_i^k(x)\|^2}. \quad (11)$$

## 6. Additional Quantitative Results

### 6.1. Per Scene Evaluation Results on 7-Scenes

In Sec. 3.2, only the average reconstruction evaluation is provided. In Tab. 7, we present more detailed per-scene results on 7-Scenes [43] to offer deeper insights. The pure regression method SLAM3R [27] performs well in scenes where the camera primarily focuses on a single corner,

such as chess, fire, and heads. However, in scenes involving longer camera trajectories, like pumpkin and redkitchen, its performance degrades due to difficulties in accurately registering points. Our method, ViSTA-SLAM, achieves the best performance in average across all four metrics.

## 6.2. Additional Trajectory Results on TUM-RGBD

In Sec. 3.1, to align with previous methods, only results for the *freiburg1* partition of the TUM RGB-D dataset [45] are reported. In Tab. 8, we also report results for the *freiburg2* and *freiburg3* partitions.

| Sequence                        | ATE RMSE (m) |
|---------------------------------|--------------|
| freiburg2_360_hemisphere        | 0.2037       |
| freiburg2_360_kidnap            | 0.4617       |
| freiburg2_desk                  | 0.0577       |
| freiburg2_large_with_loop       | 0.2170       |
| freiburg2_rpy                   | 0.0222       |
| freiburg2_xyz                   | 0.0155       |
| freiburg3_cabinet               | 0.3869       |
| freiburg3_large_cabinet         | 0.1334       |
| freiburg3_long_office_household | 0.1013       |
| freiburg3_teddy                 | 0.0789       |

Table 8. Trajectory ATE results on the *freiburg2* and *freiburg3* partitions of the TUM RGB-D dataset [45].

## 6.3. Additional Evaluation on More Datasets

In Tab. 9 and Tab. 10, we additionally report camera trajectory evaluation results on Replica [44] and ScanNet [8], as well as reconstruction evaluation results on Replica for several commonly used SLAM testing scenes.

## 7. Additional Qualitative Results

### 7.1. Pose Graph Optimization

In Fig. 7, we compare the reconstruction and trajectory estimation results with and without pose graph optimization on ScanNet [8] scene0000\_00. Pose graph optimization effectively corrects misaligned areas and averages out the errors from the frontend.

### 7.2. Wrong Loop Filtering

In Sec. 2.3, we describe feeding each loop candidate pair into our STA model to verify their spatial proximity. This is necessary because Bag of Words loop detection can produce false positives, which may significantly degrade performance by introducing misleading edges into the pose graph. As shown in Fig. 8, rejecting incorrect loop candidates using the relative pose confidence score provided by STA results in a much more stable performance.

| Scene   | ATE    | Acc.   | Comp.  | Chamfer |
|---------|--------|--------|--------|---------|
| office0 | 0.0744 | 0.0595 | 0.0226 | 0.0410  |
| office1 | 0.1934 | 0.2614 | 0.1833 | 0.2223  |
| office2 | 0.1177 | 0.0914 | 0.0316 | 0.0615  |
| office3 | 0.0485 | 0.0623 | 0.0221 | 0.0422  |
| office4 | 0.1302 | 0.1338 | 0.0688 | 0.1013  |
| room0   | 0.0688 | 0.0766 | 0.0209 | 0.0488  |
| room1   | 0.0934 | 0.1105 | 0.0552 | 0.0828  |
| room2   | 0.1363 | 0.1194 | 0.0223 | 0.0709  |

Table 9. Per-scene evaluation results on Replica [44].

| Sequence     | ATE RMSE (m) |
|--------------|--------------|
| scene0000_00 | 0.0483       |
| scene0059_00 | 0.0391       |
| scene0106_00 | 0.0559       |
| scene0169_00 | 0.0526       |
| scene0181_00 | 0.0520       |
| scene0207_00 | 0.0479       |

Table 10. Per-scene camera trajectory evaluation results on ScanNet [8].

## 7.3. More Results

In Fig. 9, we present the results of ViSTA-SLAM across various datasets. ViSTA-SLAM demonstrates stable performance despite differing camera motions in these scenes. As before, light blue frustums represent camera poses, blue lines connect neighboring views, while orange lines indicate loop closures.

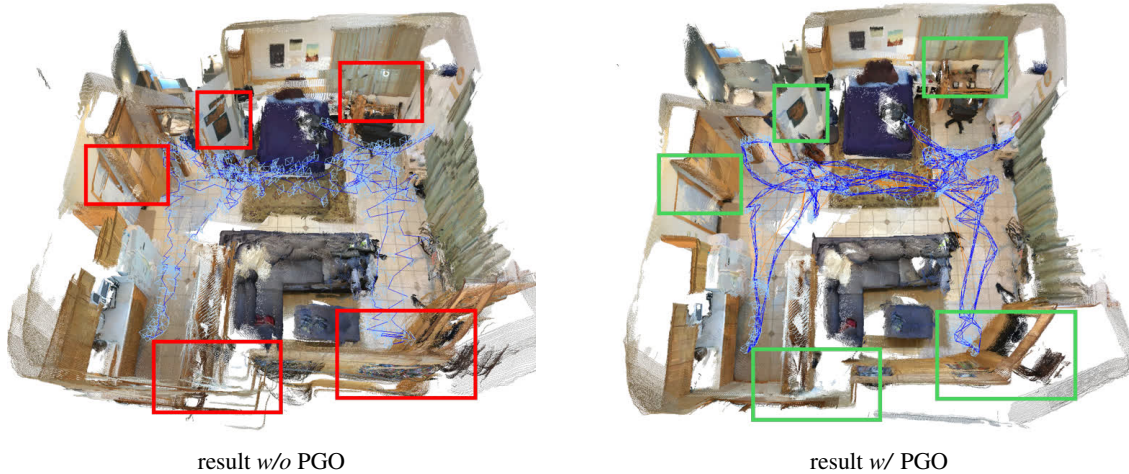

Figure 7. **Qualitative Comparison for Pose Graph Optimization.** Red boxes highlight regions with misalignments, while green boxes indicate areas where these misalignments have been corrected after pose graph optimization.

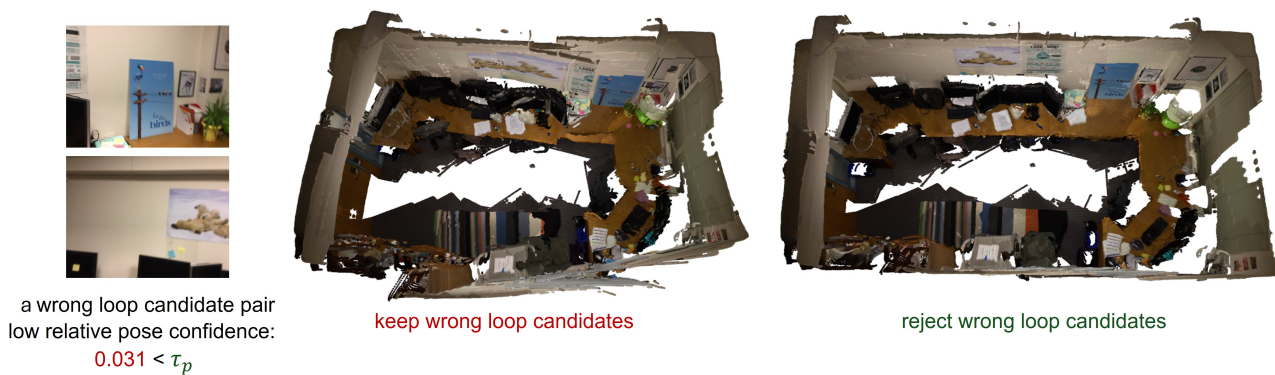

Figure 8. **Qualitative Comparison of Wrong Loop Filtering.** Keeping wrong loop candidates decreases the performance a lot.



BundleFusion [9] apt2

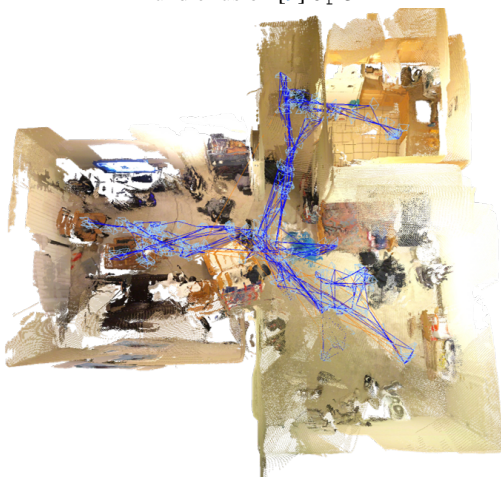

TUM-RGBD [45] floor

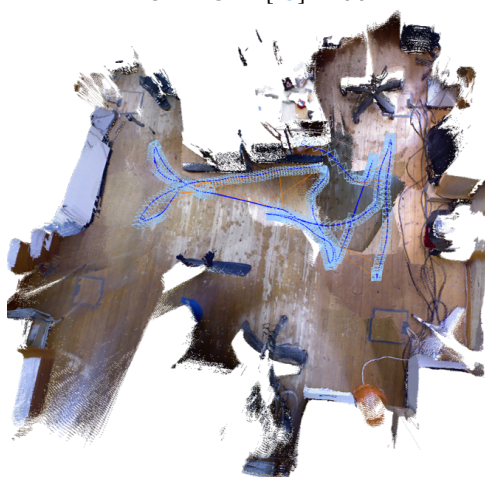

BundleFusion [9] apt0

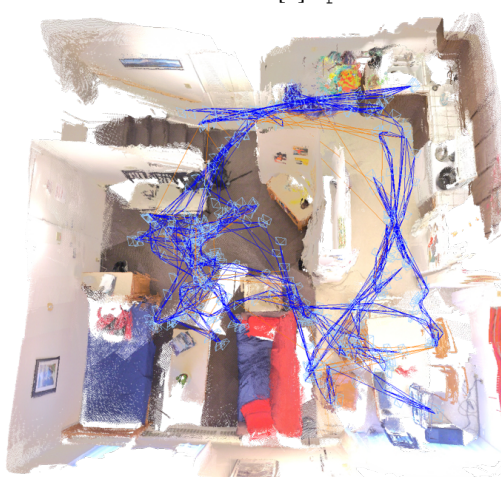

7-Scenes [43] pumpkin

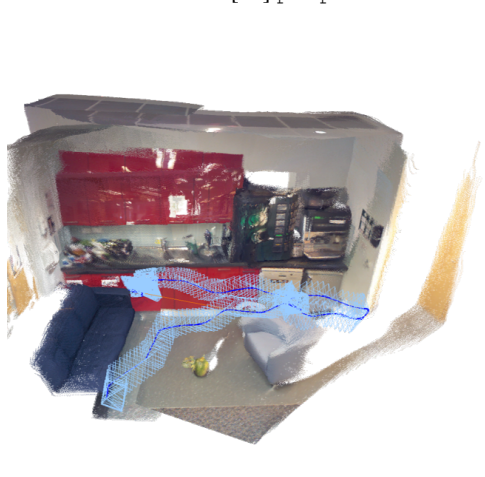

M2DGR [55] room\_03

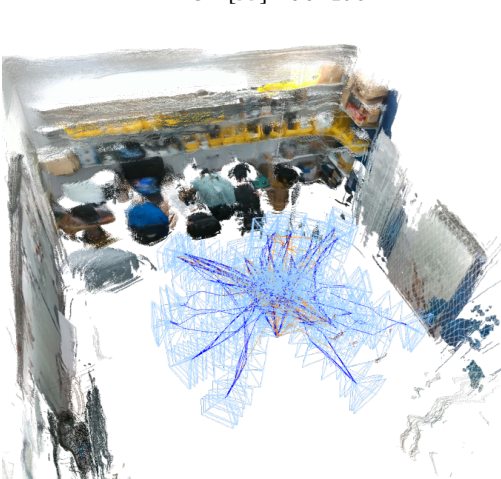

M2DGR [55] room\_01

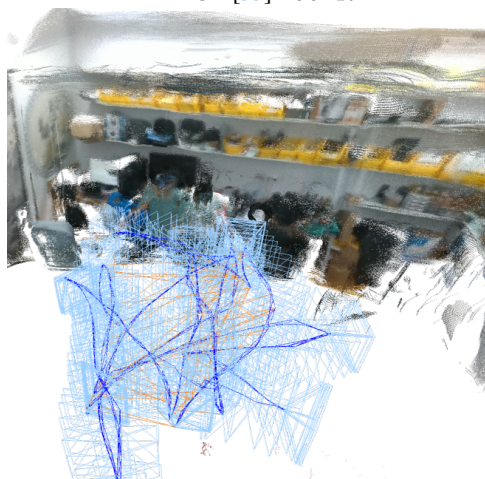

Figure 9. **More Qualitative Results.** Reconstructions and camera trajectories from different datasets.
